# Supplementary material for: Highly selective R,S-coordination of non racemic (1R,2R)-(1,2-dialkyl)-1,2-diamine cyclohexane derivatives to palladium dichloride
Source: Royal Society of Chemistry journal article supplement (doi:10.1039/b613961b), 2007-01-01
Supplement: b613961b.pdf [file b613961b.pdf]

## Supplementary Material

### Highly selective *R,S* – Coordination of non racemic (1*R*,2*R*)- (1,2 dialkyl)-1,2 diamine cyclohexane derivatives to palladium dichloride.

Esfandiar Rafii, Benjamin Dassonneville and Andreas Heumann

Table 1. Proton and fluorine shift differences (ppm) in selected alkyl substituted chiral *trans*-1,2 diamino cyclohexanes coordinated to PdCl<sub>2</sub> (**3**).

|           | Substituents at N                                    | $\Delta\delta$ H <sub>1</sub> -H <sub>2</sub> | $\Delta\delta$ H <sub>7</sub> -H <sub>8</sub> | $\Delta\delta$ H <sub>7'</sub> -H <sub>8'</sub> | $\Delta\delta$ NH | $\Delta\delta$ X |
|-----------|------------------------------------------------------|-----------------------------------------------|-----------------------------------------------|-------------------------------------------------|-------------------|------------------|
| <b>3a</b> | CH <sub>2</sub> Ph, H                                | 1.7                                           | 0.11                                          | 0.4                                             | 0.17              | -                |
| <b>3b</b> | CH <sub>2</sub> <i>p</i> -F-Ph, H                    | 1.69                                          | 0.25                                          | 0.2                                             | 0.2               | 0.8 X=F          |
| <b>3c</b> | CH <sub>2</sub> <i>p</i> -CF <sub>3</sub> -Ph, H     | 1.28                                          | 0.13                                          | 0.35                                            | 0.73              | 0.16 X=F         |
| <b>3d</b> | CH <sub>2</sub> <i>p</i> -OMe-Ph, H                  | 1.64                                          | 0.19                                          | 0.28                                            | 0.2               | 0.06 X=OMe       |
| <b>3e</b> | CH <sub>2</sub> <i>m</i> -CF <sub>3</sub> -Ph, H     | 1.78                                          | 0.18                                          | 0.34                                            | 0.05              | 0.16 X=F         |
| <b>3f</b> | CH <sub>2</sub> <i>m</i> -NO <sub>2</sub> -Ph, H     | 1.6                                           | 0.26                                          | 0.32                                            | 0                 | -                |
| <b>3g</b> | CH <sub>2</sub> <i>o</i> -NO <sub>2</sub> -Ph, H     | 1.78                                          | 0.18                                          | 0.34                                            | 0.05              | -                |
| <b>3h</b> | CH <sub>2</sub> mesityl, H                           | 1.53                                          | 0.41                                          | 0.45                                            | 0.13              | 0.1 X=Me         |
| <b>3i</b> | 1-naphthyl, H                                        | 1.62                                          | 0.06                                          | 0.91                                            | 0.73              | -                |
| <b>3j</b> | CH <sub>2</sub> -1-furfuryl, H                       | 1.93                                          | 0.07                                          |                                                 | 0.08              | -                |
| <b>3k</b> | CH <sub>2</sub> C(CH <sub>3</sub> ) <sub>3</sub> , H | 0.43                                          | 0.19                                          | 0.64                                            | 0.45              | 0.11 X=Me        |

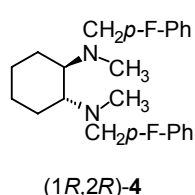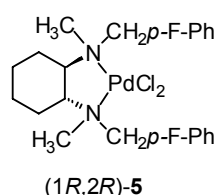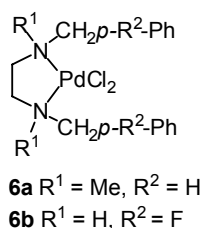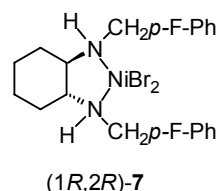

## Scheme 4

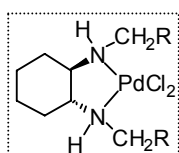

### Pd[(*R,R*)-*N,N'*-Cyclohexane-1,2-diamine]Cl<sub>2</sub>

Palladium dichloride bisacetonitrile (0.2 mmol) is added at room temperature to a stirred solution of the chiral diamine (0.2 mmol) in 1 mL of methylene chloride. In general the reaction is finished after 15 min. After evaporation of the solvent a bright yellow palladium complex is recovered. Purification by recrystallisation from acetonitrile, methylene chloride, or by flash chromatography. Some complexes, e.g. **3i** are extremely insoluble in common solvents and are difficult to handle.

**Pd[(*R,R*)-*N,N'*-Dibenzycyclohexane-1,2-diamine]Cl<sub>2</sub> **3a**, (C<sub>20</sub>H<sub>26</sub>Cl<sub>2</sub>N<sub>2</sub>Pd) yellow solid (90% yield), <sup>1</sup>H NMR (500MHz, CDCl<sub>3</sub>)  $\delta$ : 8.05 (d, 2H, *J* = 7.0 Hz), 7.55 - 7.25 (m,**

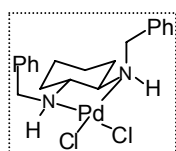

8H), 5.62 (br, 1H, NH), 5.46 (br, 1H, NH), 4.36 (dd, 2H,  $J = 13.3, 4.2$  Hz), 4.22 (br, 1H), 4.22 (d, 1H,  $J = 14.2$  Hz), 3.78 (dd, 1H,  $J = 13.4, 2.3$  Hz), 3.36 (dd, 1H,  $J = 14.5, 8.9$  Hz), 2.50 (m, 1H), 2.05 (m, 1H), 1.6 – 1.35 (m, 5H), 1.2 – 1.05 (m, 2H), 0.9 – 0.8 (m, 1H).  $^{13}\text{C}$  NMR (75MHz,  $\text{CDCl}_3$ )  $\delta$  137.2, 135.2, 130.7, 128.9, 128.77, 128.73, 128.66, 128.0, 66.4, 62.2, 52.1, 51.1, 31.4, 30.1, 24.3, 24.2.  $[\alpha]_{\text{D}} + 219$  ( $c = 0.2, \text{CH}_2\text{Cl}_2$ ).

**(R,R)-N,N'-Bis((4-fluorophenyl)methyl)cyclohexane-1,2-diamine 2b**, colourless oil (84%);  $^1\text{H}$

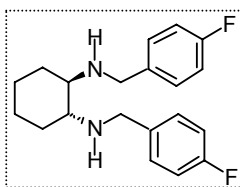

NMR (200 MHz,  $\text{CDCl}_3$ )  $\delta$  7.24 (m, 4H), 6.97 (m, 4H), 3.88 (d, 2H,  $J = 13.2$  Hz), 3.6 (d, 2H,  $J = 13.2$  Hz), 2.20 (m, 4H), 1.75 (m, 4H), 1.4 – 0.9 (m, 4H).  $^{13}\text{C}$  NMR (50 MHz,  $\text{CDCl}_3$ ):  $\delta$  161.6 (d,  $J = 244$  Hz), 136.7, 129.3 (d,  $J = 8$  Hz), 114.9 (d,  $J = 21$  Hz), 60.8, 50.0, 31.4, 24.8;  $^{19}\text{F}$  NMR (188 MHz):  $\delta$  -116.8; IR ( $\text{cm}^{-1}$ ) 3301, 2925, 2843, 1560, 1490, 1465, 1334. Anal. Calcd. for  $\text{C}_{20}\text{H}_{24}\text{F}_2\text{N}_2$  (330.41): C, 72.7; H, 7.32; N, 8.48. Found: C, 71.93; H, 7.68; N 8.61.  $[\alpha]_{\text{D}} - 79.7$  ( $c = 1, \text{CH}_2\text{Cl}_2$ ).

**Pd[(R,R)-N,N'-Bis((4-fluorophenyl)methyl)cyclohexane-1,2-diamine]Cl<sub>2</sub> 3b**, ( $\text{C}_{20}\text{H}_{24}\text{Cl}_2$

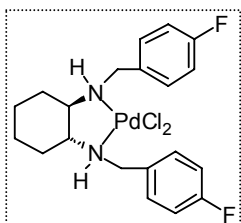

$\text{F}_2\text{N}_2\text{Pd}$ ) yellow solid (92% yield),  $^1\text{H}$  NMR (200MHz,  $\text{CDCl}_3$ )  $\delta$  8.04 (m, 2H), 7.53 (m, 2H), 7.19 (t, 2H,  $J = 8.6$  Hz), 7.0 (t, 2H,  $J = 8.6$  Hz), 5.72 (m, 1H, NH), 5.49 (br, 1H, NH), 4.44 (dd, 1H,  $J = 13.6, 3.2$  Hz), 4.15 (br, 1H), 4.14 (d, 1H,  $J = 14.4$  Hz), 3.67 (dd, 1H,  $J = 13.3, 2.4$  Hz), 3.46 (dd, 1H,  $J = 14.4, 10$  Hz), 2.45 (m, 1H), 2.17 (m, 1H), 1.75 – 1.6 (m, 5H), 1.6 – 1.1 (m, 2H), 1.0 – 0.5 (m, 1H).  $^{13}\text{C}$  NMR (75MHz,  $\text{CDCl}_3$ )  $\delta$  163.0 (d,  $J = 249$  Hz), 162.5 (d,  $J = 249$  Hz), 132.7, 132.57 (d,  $J = 7.5$  Hz), 130.7 (d,  $J = 8.3$  Hz), 130.57 (d,  $J = 3$  Hz), 116.3 (d,  $J = 22$  Hz), 115.8 (d,  $J = 22$  Hz), 66.0, 62.1, 50.4, 50.2, 31.4, 30.0, 24.4, 24.2.  $^{19}\text{F}$  NMR (188 MHz):  $\delta$  -112.9, -113.7.  $[\alpha]_{\text{D}} + 165$  ( $c = 0.08, \text{CH}_2\text{Cl}_2$ ).

**Pd[(R,R)-N,N'-Bis((4-trifluoromethylphenyl)methyl)cyclohexane-1,2-diamine]Cl<sub>2</sub> 3c**,

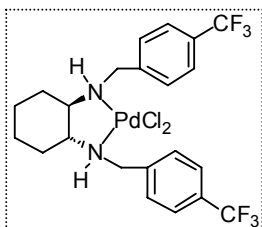

( $\text{C}_{22}\text{H}_{24}\text{F}_6\text{N}_2\text{PdCl}_2$ ) yellow solid (89%);  $^1\text{H}$  NMR (200MHz,  $\text{CDCl}_3$ )  $\delta$  8.26 (d, 2H,  $J = 8.2$  Hz), 7.78 (d, 2H,  $J = 8.2$  Hz), 7.63 (s, 4H), 5.81 (br, 1H), 5.68 (br, 1H), 4.53, (dd, 1H,  $J = 13.6, 3.0$  Hz), 4.40 (d, 1H,  $J = 14.0$  Hz), 4.07 – 4.28 (m, 1H), 3.83 (dd, 1H,  $J = 13.4, 2.0$  Hz), 3.48 (dd, 1H,  $J = 15.0, 9.0$  Hz), 2.6 – 2.3 (m, 1H), 2.25 – 2.1 (m, 1H), 1.7 – 1.3 (m, 4H), 1.25 – 1.1 (m, 2H), 1.0 – 0.7 (m, 1H);  $^{13}\text{C}$  NMR (50MHz, with some drops of  $\text{DMSO-d}_6$ )  $\delta$  141.7, 139.5, 131.3, 129.1, 126.3, and 126.1 (2q,  $J = 4$  Hz), 66.4, 63.1, 51.3, 51.2, 31.8, 30.6, 24.8, 24.3;  $^{19}\text{F}$  NMR (188MHz)  $\delta$  - 63.08, - 63.15.  $[\alpha]_{\text{D}} + 133$  ( $c = 0.12, \text{CHCl}_3$ ).

**Pd[(R,R)-N,N'-Bis((3-trifluoromethylphenyl)methyl)cyclohexane-1,2-diamine]Cl<sub>2</sub> 3e**,

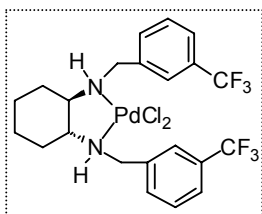

( $\text{C}_{22}\text{H}_{24}\text{F}_6\text{N}_2\text{PdCl}_2$ ) yellow solid (89%);  $^1\text{H}$  NMR (200MHz,  $\text{CDCl}_3$ )  $\delta$  8.66 (d, 1H,  $J = 6.8$  Hz), 8.08 (s, 1H), 7.89 (d, 1H,  $J = 6.9$  Hz), 7.73 – 7.53 (m, 5H), 5.76 (br, 2H), 4.59 (dd, 1H,  $J = 13.6, 3.0$  Hz), 4.40 (d, 1H,  $J = 14.4$  Hz), 4.18 (br, 1H), 3.83 (dd, 1H,  $J = 13.6, 2.0$  Hz), 3.50 (dd, 1H,  $J = 14.5, 9.0$  Hz), 2.5 – 2.3 (m, 1H), 2.25 – 2.1 (m, 1H), 1.7 – 1.3 (m, 4H), 1.25 – 1.1 (m, 2H), 1.0 – 0.8 (m, 1H);  $^{13}\text{C}$  NMR (75MHz)  $\delta$  138.1, 135.9, 134.0, 132.1, 129.9, 129.7, 127.2 (t,  $J = 3$  Hz), 125.9 – 125.7 (m), 125.3 – 125.1 (m), 66.0, 62.9, 51.1, 50.8, 31.5, 30.2, 24.4, 24.1;  $^{19}\text{F}$  NMR (188MHz)  $\delta$  -63.01, -63.17.  $[\alpha]_{\text{D}} + 148$  ( $c = 0.2, \text{CH}_2\text{Cl}_2$ ).

**Pd[(R,R)-N,N'-Bis(2,2-dimethylpropyl)cyclohexane-1,2-diamine]Cl<sub>2</sub> 3k**: ( $\text{C}_{16}\text{H}_{34}\text{N}_2\text{PdCl}_2$ )  $^1\text{H}$  NMR

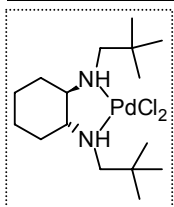

(300MHz,  $\text{CDCl}_3$ )  $\delta$  5.05 – 4.95 (m, 1H), 4.55 – 4.45, (m, 1H), 4.45 – 4.40 (m, 1H), 3.20 (dd, 1H,  $J = 13.4, 5.3$  Hz), 3.08 (dd, 1H,  $J = 14.0, 6.1$  Hz), 2.90 (dd, 1H,  $J = 14.0, 1.9$  Hz), 2.74 (ddd, 1H,  $J = 14.5, 10.6, 3.9$  Hz), 2.55 (dd, 1H,  $J = 13.4, 4.7$  Hz), 2.31 (dm, 1H,  $J =$

12.0 Hz), 1.85 - 1.5 (m, 3H), 1.5 - 0.9 (m, 4H), 1.26, (s, 9H); 1.15, (s, 9H);  $^{13}\text{C}$  NMR (75 MHz)  $\delta$  67.0, 64.1, 60.3, 59.4, 31.8, 31.2, 31.1, 30.8, 29.9, 29.5, 24.5, 23.9.  $[\alpha]_{\text{D}} + 122$  (c 0.5,  $\text{CH}_2\text{Cl}_2$ ).

**Pd[(*R,R*)-*N,N',N,N'*-Dimethylbis((4-Fluorophenyl)methyl)cyclohexane-1,2-diamine]Cl<sub>2</sub> 5a-c,**

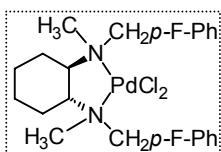

( $\text{C}_{22}\text{H}_{28}\text{Cl}_2\text{F}_2\text{N}_2\text{Pd}$ ) yellow solid (90% yield), mixture of 3 complexes

$^{19}\text{F}$  NMR (188 MHz):  $\delta$ : -111.2 (21%, *dl*-1), -111.7 and -112.0 (55%, *meso*), -111.8 (20%, *dl*-2), -114.5 (3%, unknown).

$^1\text{H}$  NMR (200MHz,  $\text{CDCl}_3$ )  $\delta$  8.82 (m, integrates for 0.4), 8.34 (dd, integrates for 2.0,  $J = 8.5, 5.3$  Hz), 7.94 (dd, integrates for 1.18,  $J = 8.5, 5.3$  Hz), 7.73 (m, integrates for 0.66), 7.65 (dd, integrates for 1.18,  $J = 8.5, 5.3$  Hz), 7.3 - 7.18 (m, integrates for 4.5), 7.15 - 7.05 (m, integrates for 4.5), benzylic protons *vide infra*, methyl groups at 3.03, 2.97, 2.52, 2.49, 2.17, cyclohexane protons: 3.2 - 0.8 (several multiplets).

After chromatography:

$^{19}\text{F}$  NMR (188 MHz): *dl*-1 (10%)  $\delta$  -111.3; *dl*-2 (26%)  $\delta$  -111.8; **5c** (63%)  $\delta$  -111.7, -112.6.

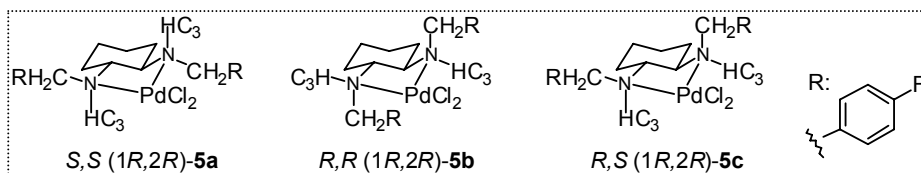

|              |                                               |
|--------------|-----------------------------------------------|
| <i>dl</i> -1 | 10% (F); 15% (H)                              |
| <i>dl</i> -2 | 26% (F); 35% (H)                              |
| <i>meso</i>  | 63% (F); 47% (H)                              |
|              | (F: $^{19}\text{F}$ NMR, H: $^1\text{H}$ NMR) |

$^1\text{H}$  NMR (300MHz,  $\text{CDCl}_3$ )  $\delta$  of benzylic protons (all d)

*dl*-1 (**5a**) 4.47 (d, 2H,  $J = 13.2$  Hz), 3.26 (d, 2H,  $J = 13.4$  Hz) (integrates for 0.30)

*dl*-2 (**5b**) 4.96 (d, 2H,  $J = 13.0$  Hz), 2.96 (d, 2H, *partially hidden*) (integrates for 0.70)

*meso* (**5c**) 4.23 (d, 1H,  $J = 13.2$  Hz), 3.54 (d, 1H,  $J = 13.4$  Hz) (integrates for 0.5) and 4.74 (d, 1H,  $J = 13.4$  Hz), 3.67 (d, 1H,  $J = 13.2$  Hz) (integrates for 0.5)
